# Supplementary figures and images for: Global tropospheric ozone column retrievals from OMI data by means of neural networks
Source: Copernicus journal article supplement (doi:10.5194/amt-6-895-2013), 2013-04-09

## SODANKYLA

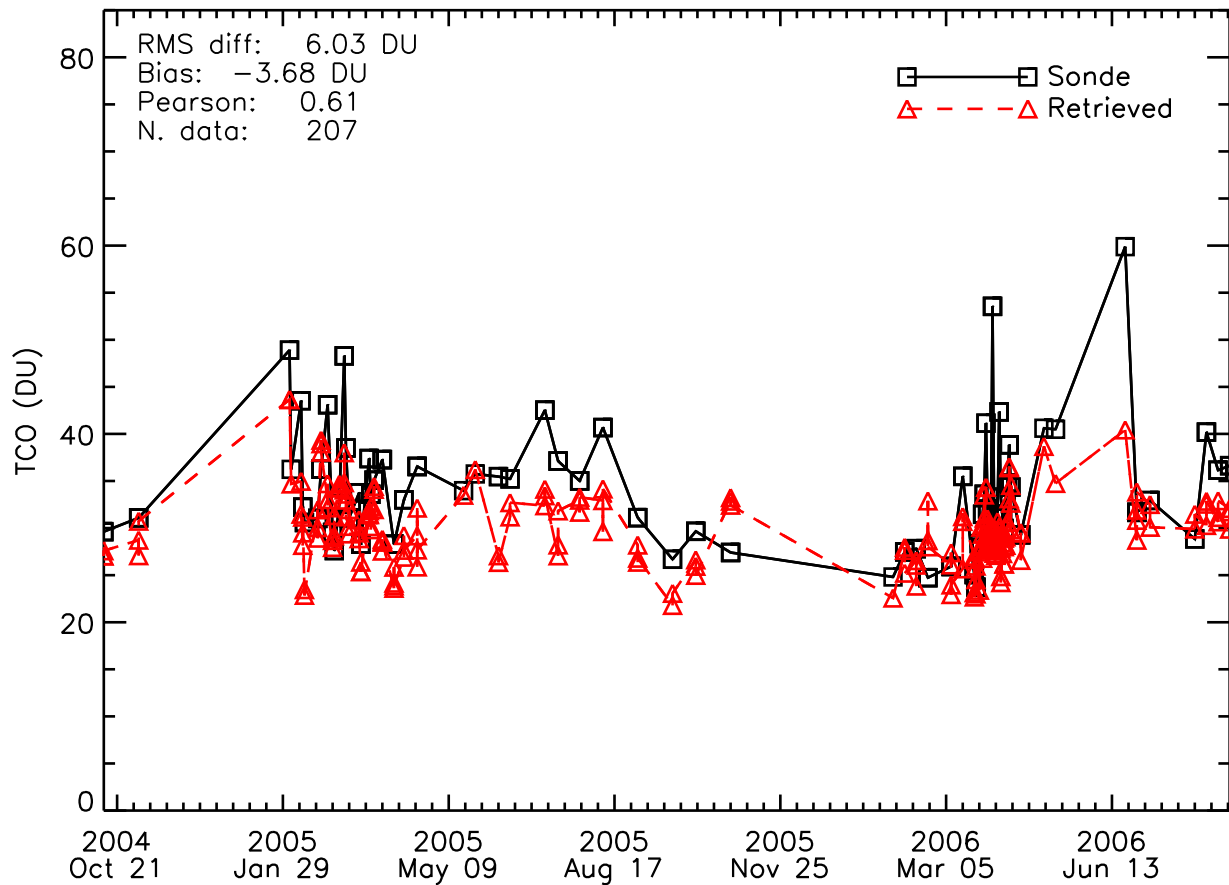

Supplement: Supplementary file 1 [file amt-6-895-2013-supplement.zip]

## MAXARANGUAPE (SHADOZ-NATAL)

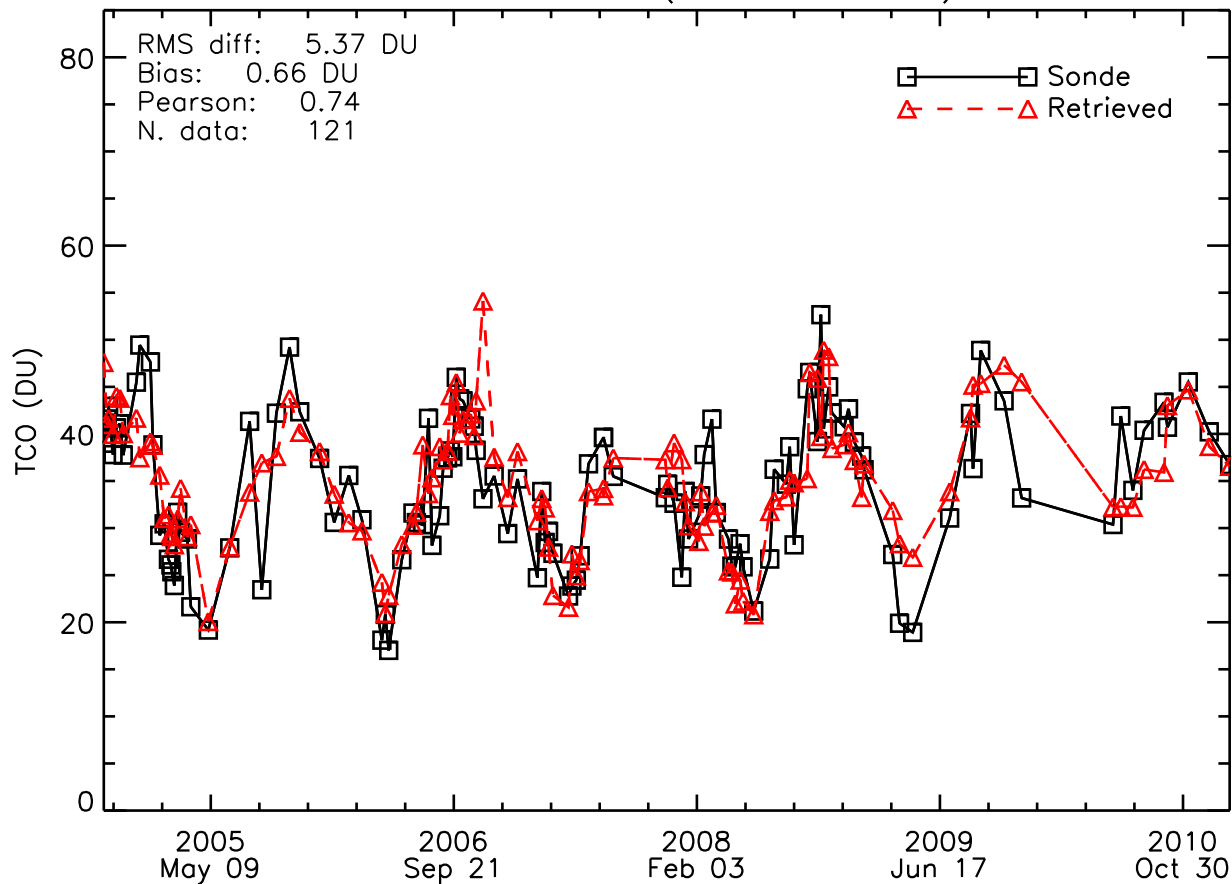

Supplement: Supplementary file 2 [file amt-6-895-2013-supplement.zip]

# HUNTSVILLE

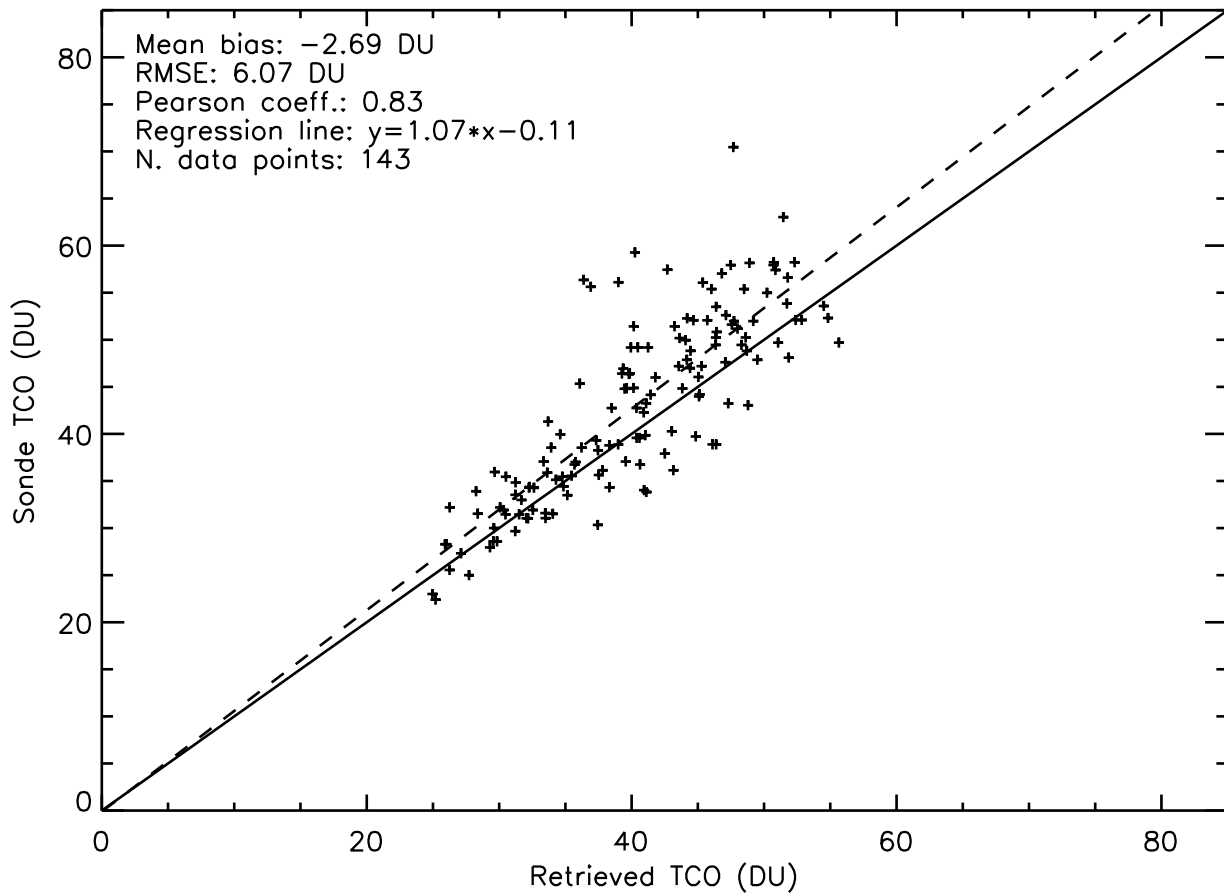

Supplement: Supplementary file 3 [file amt-6-895-2013-supplement.zip]

# ASCENSION ISLAND

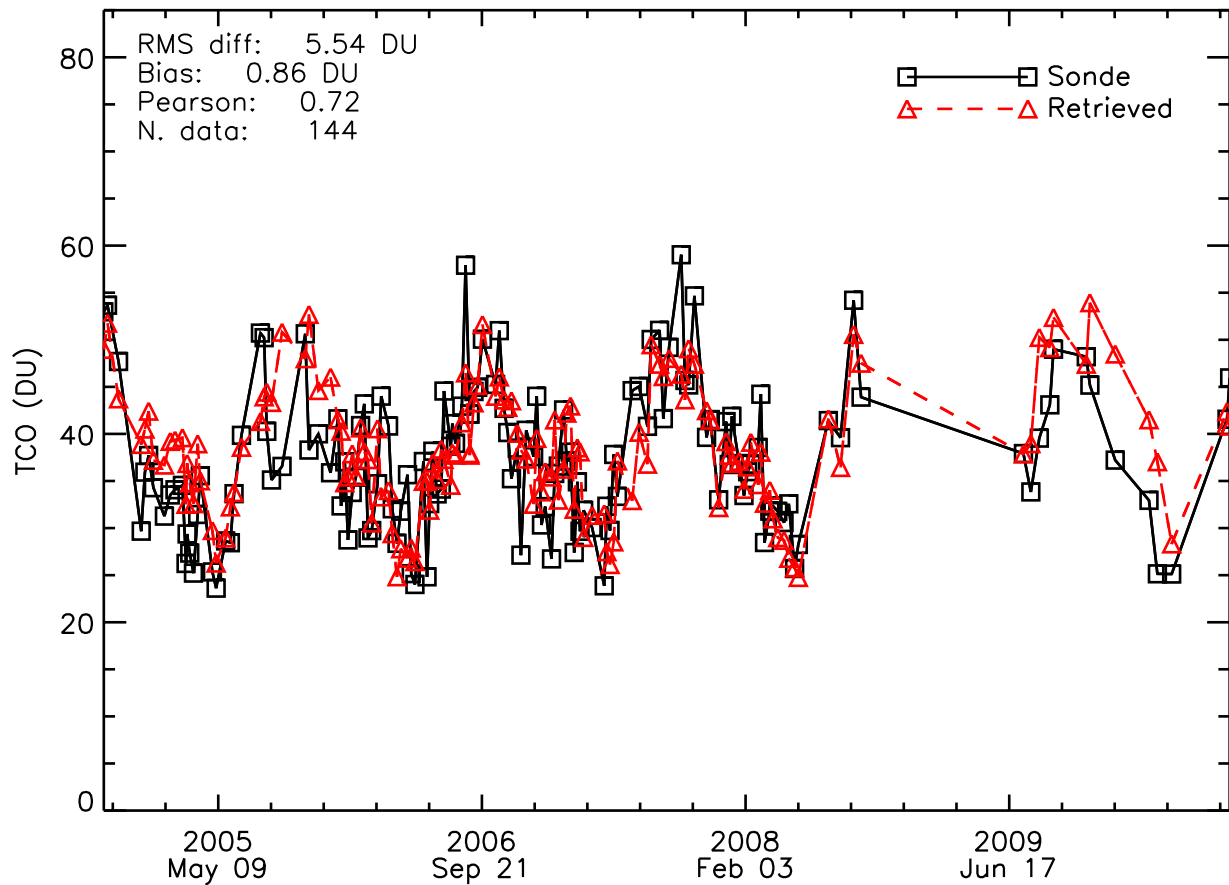

Supplement: Supplementary file 4 [file amt-6-895-2013-supplement.zip]

# SUVA (FIJI)

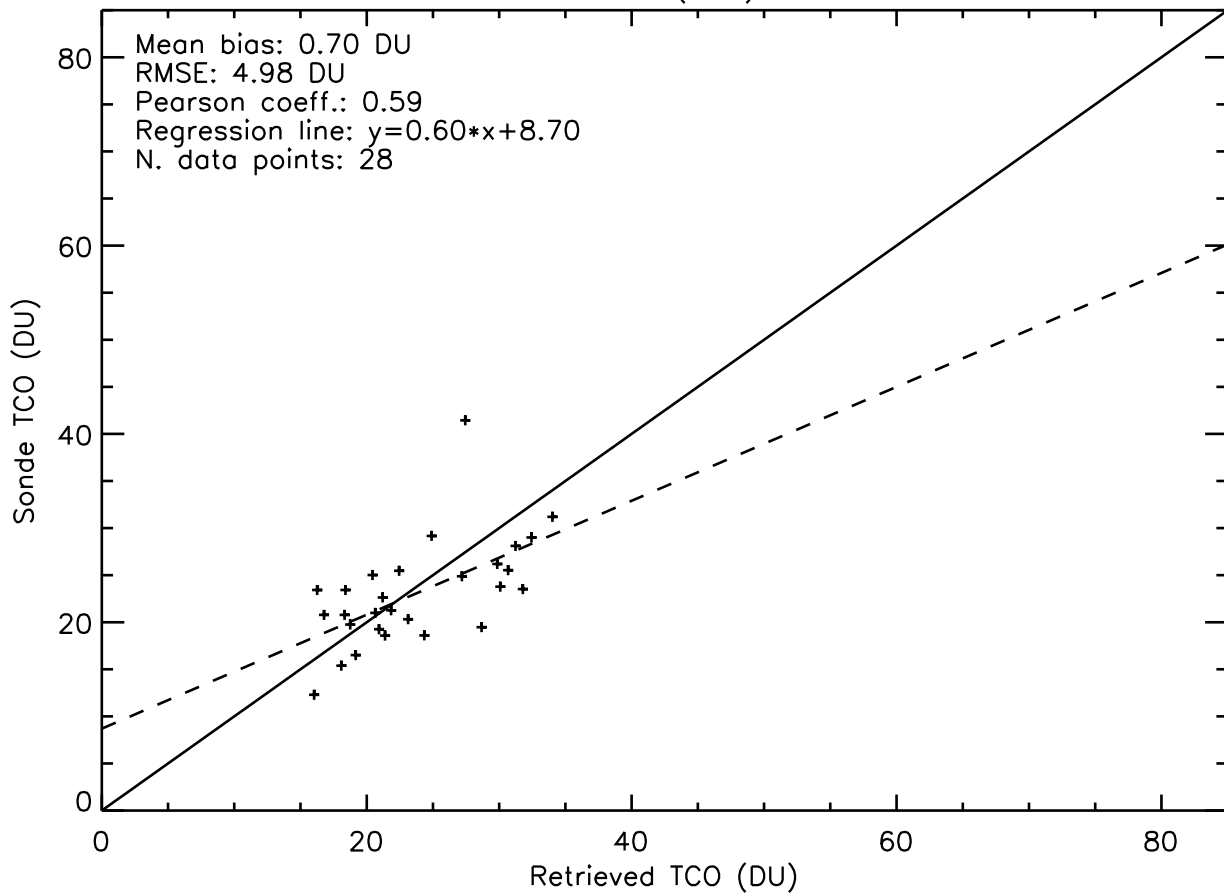

Supplement: Supplementary file 5 [file amt-6-895-2013-supplement.zip]

## NAHA

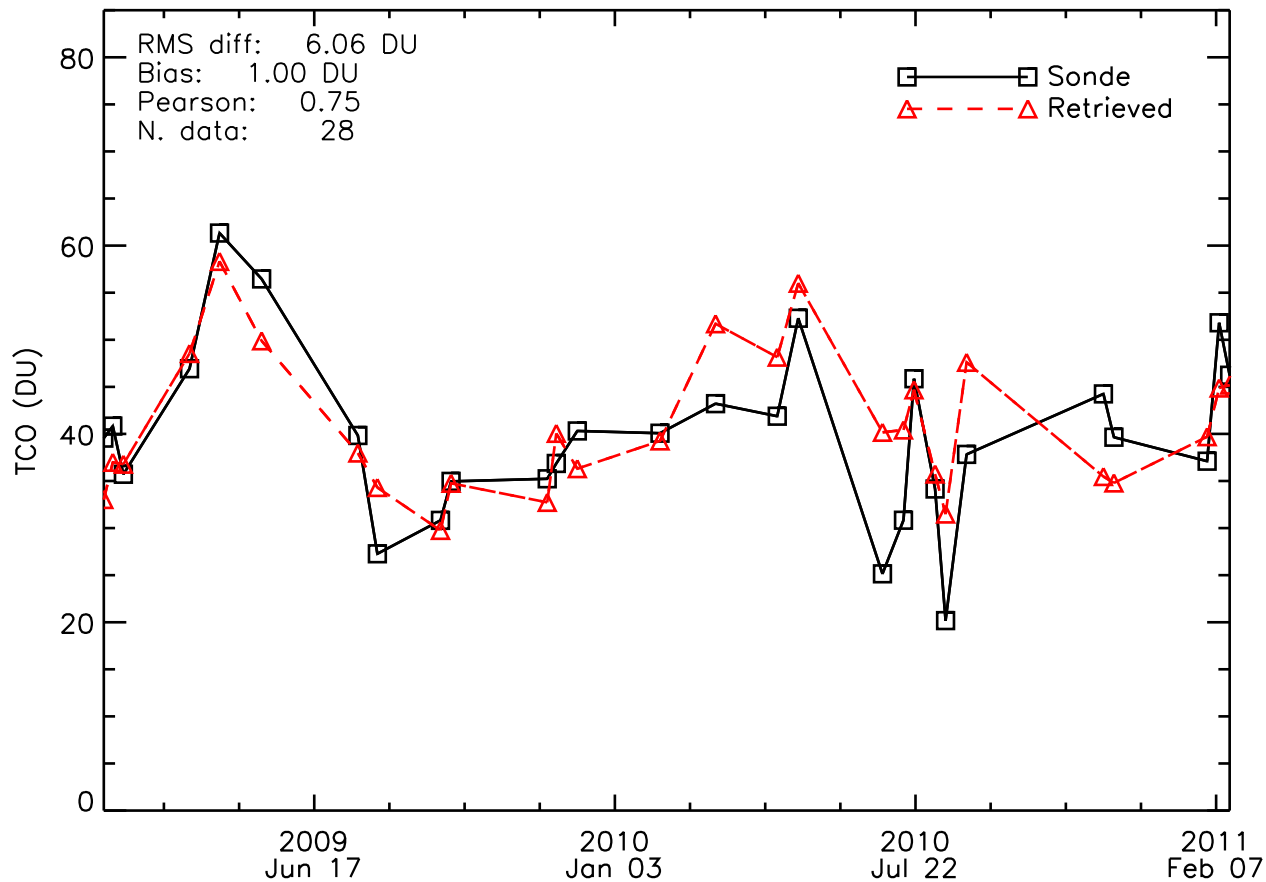

Supplement: Supplementary file 6 [file amt-6-895-2013-supplement.zip]

## SCORESBYSUND

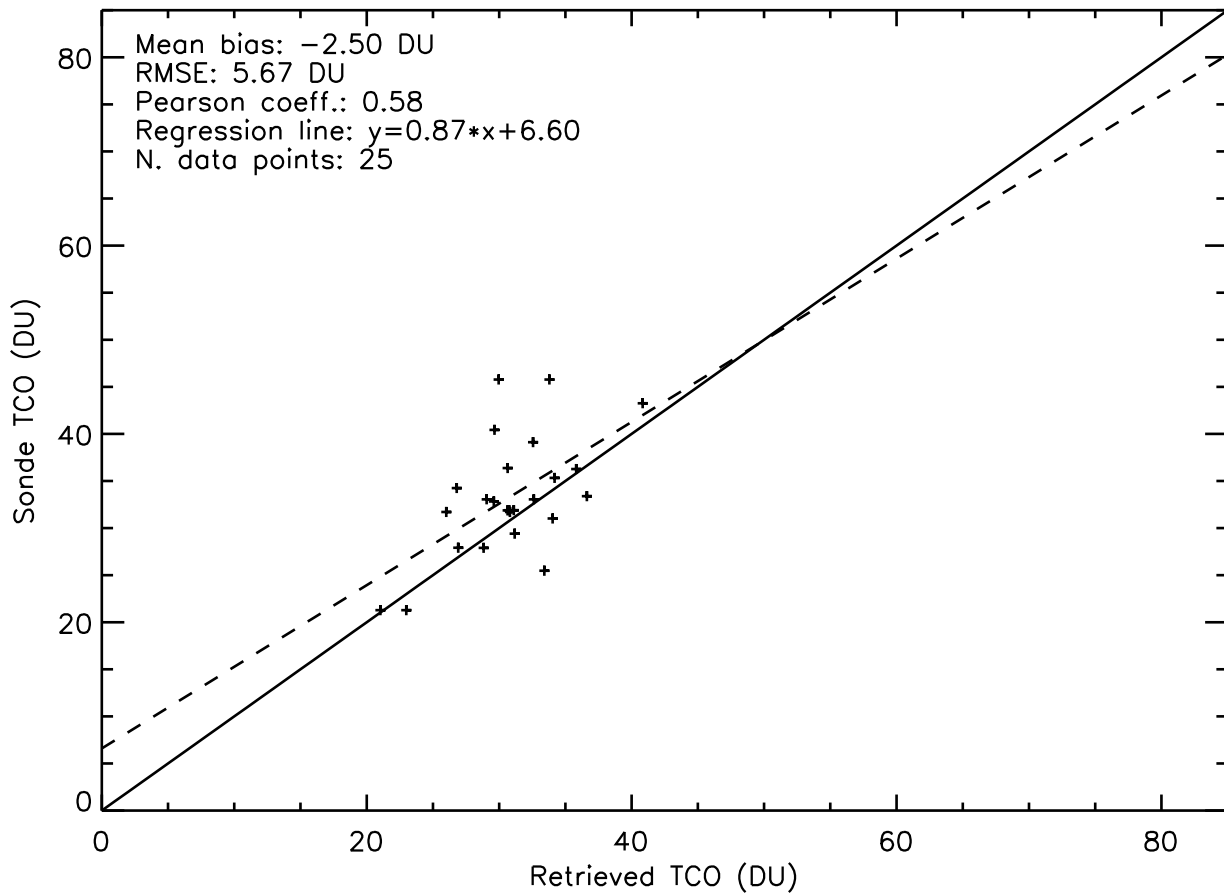

Supplement: Supplementary file 7 [file amt-6-895-2013-supplement.zip]

## WATUKOSEK (JAVA)

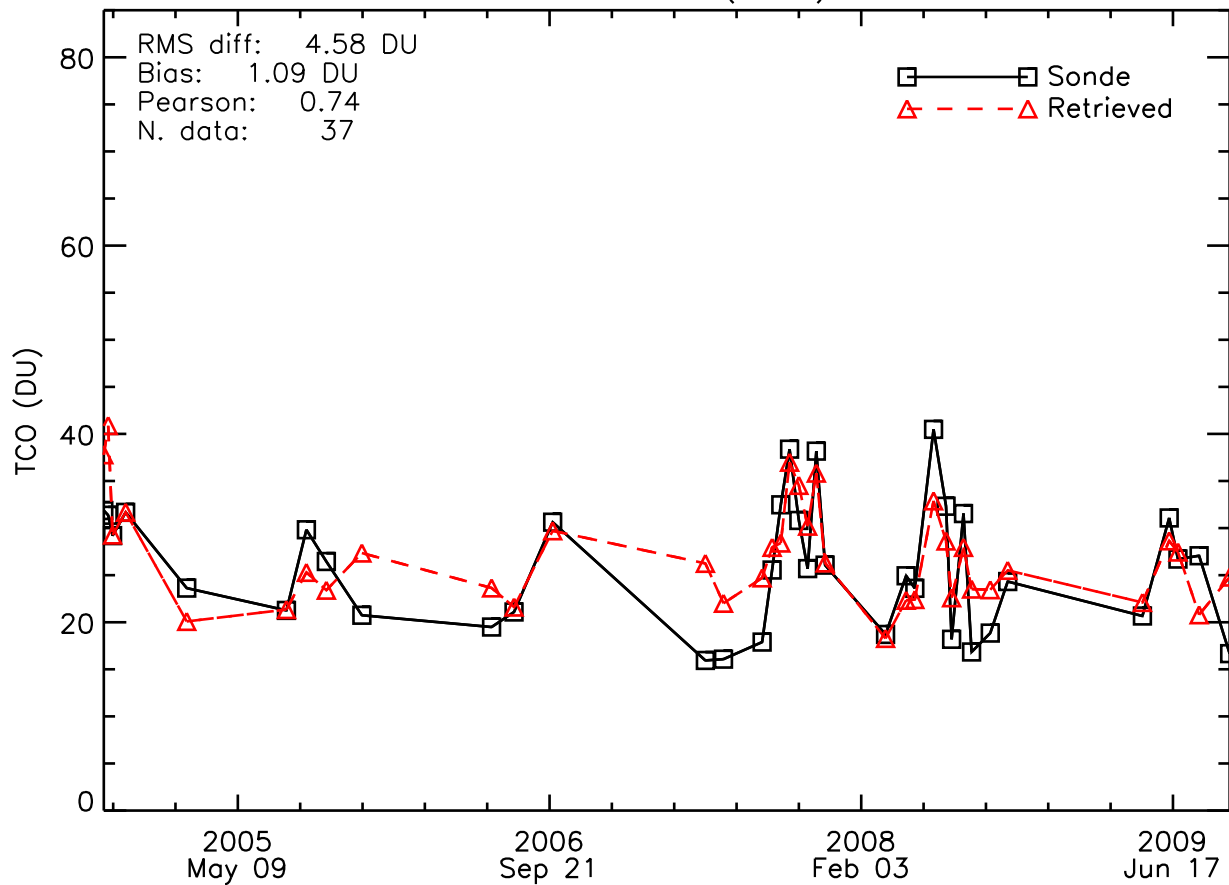

Supplement: Supplementary file 8 [file amt-6-895-2013-supplement.zip]

# LA REUNION

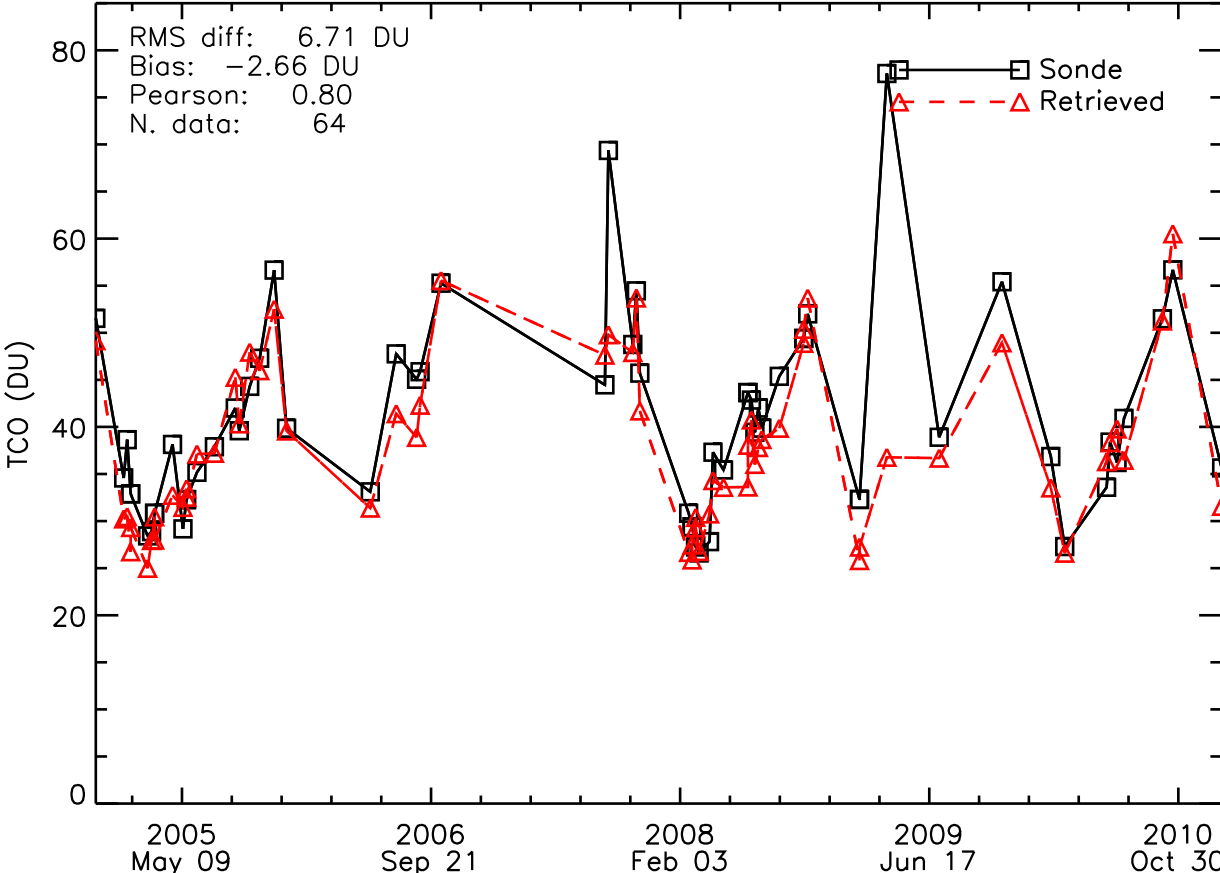

Supplement: Supplementary file 9 [file amt-6-895-2013-supplement.zip]

## SALEKHARD

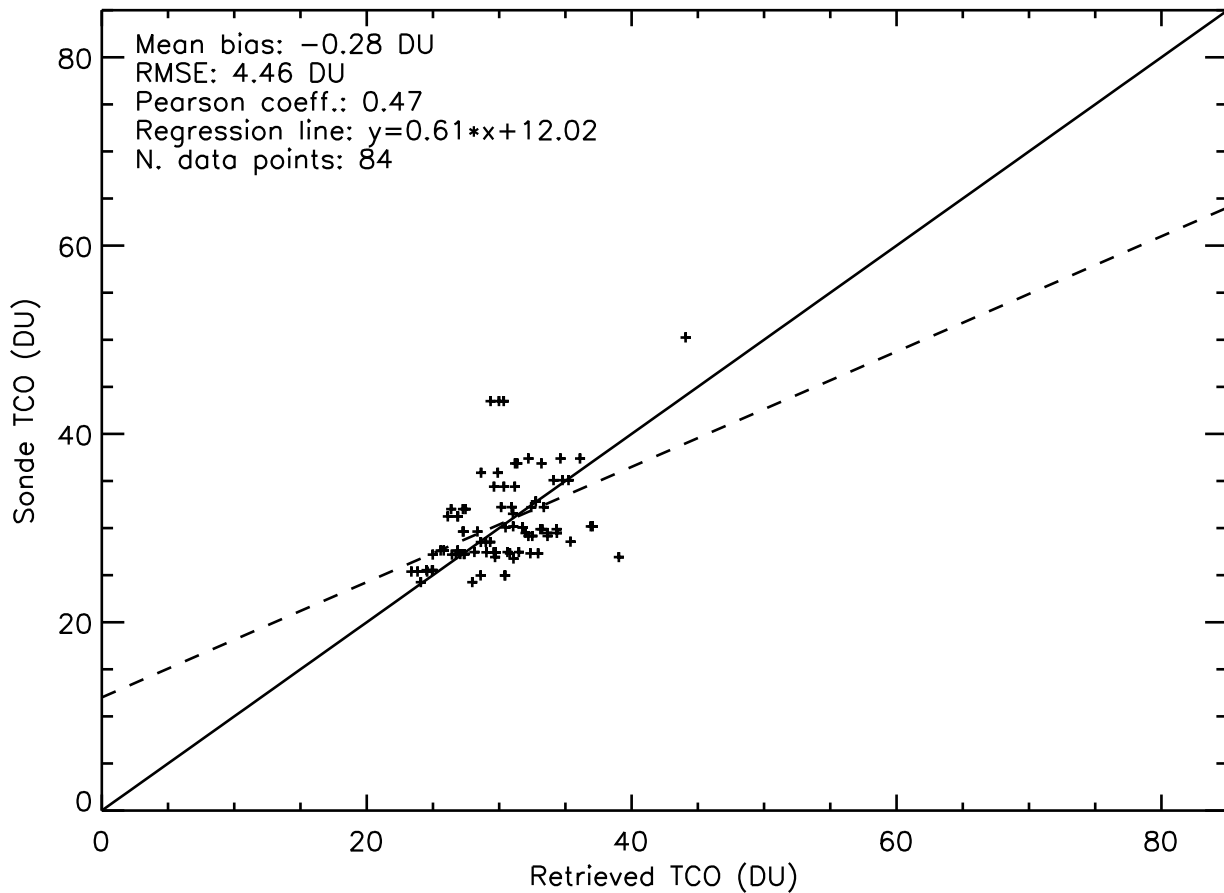

Supplement: Supplementary file 10 [file amt-6-895-2013-supplement.zip]

## HUNTSVILLE

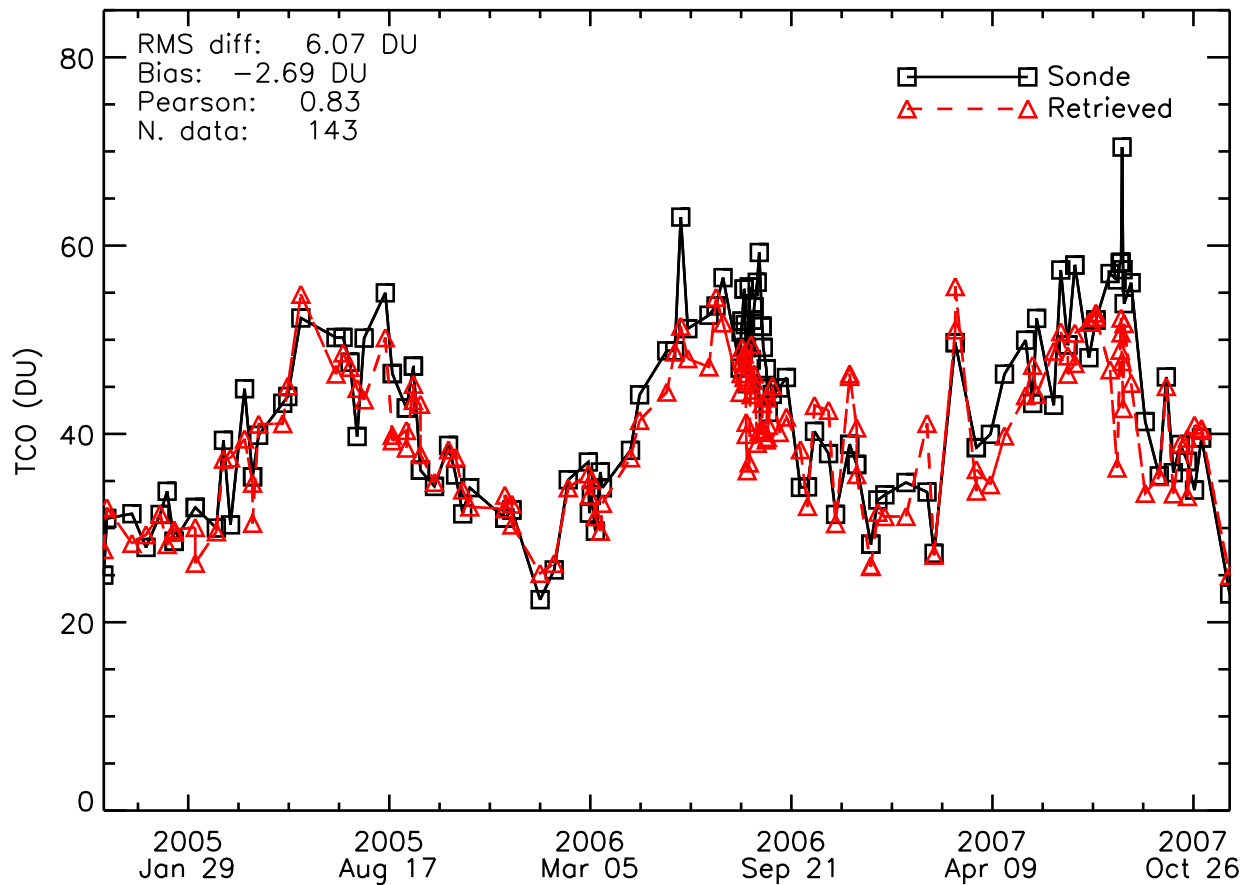

Supplement: Supplementary file 11 [file amt-6-895-2013-supplement.zip]

## EGBERT

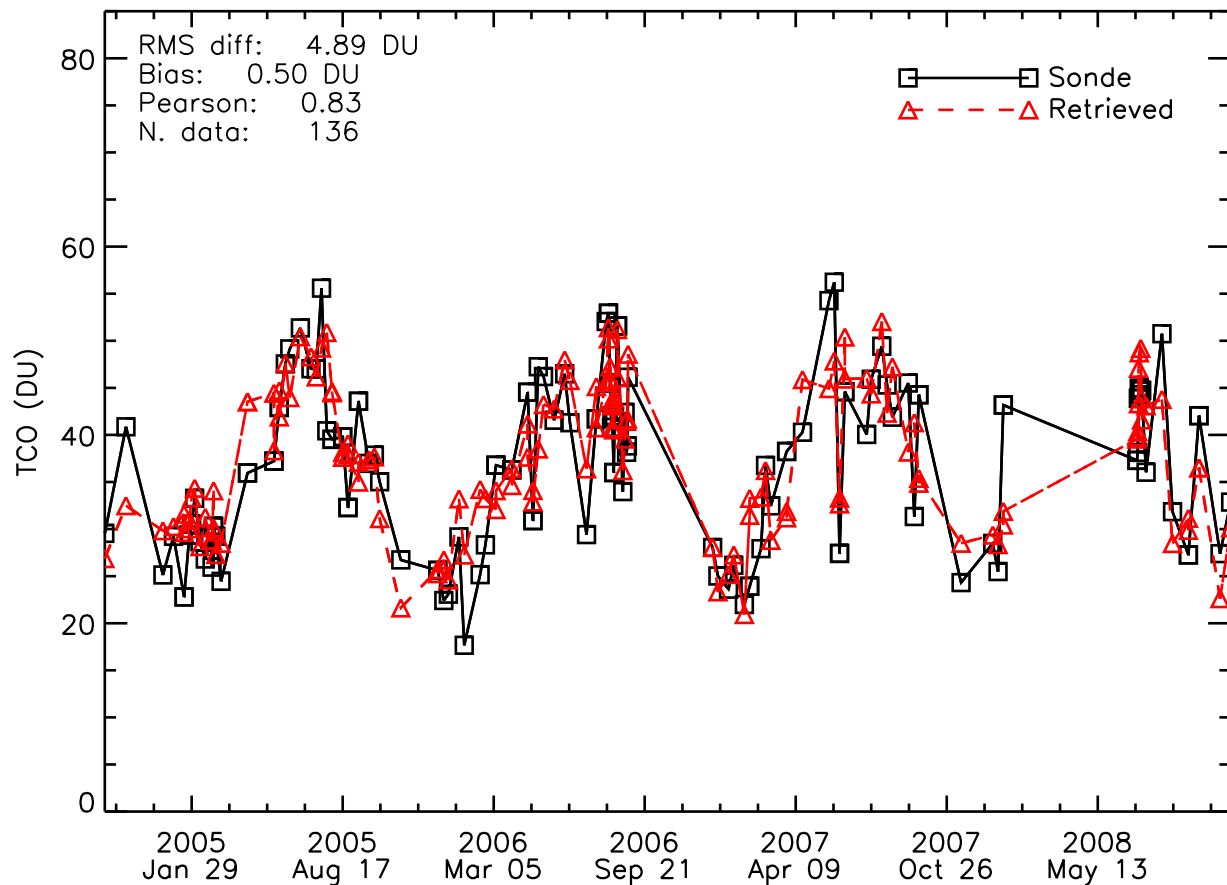

Supplement: Supplementary file 12 [file amt-6-895-2013-supplement.zip]

## SAPPORO

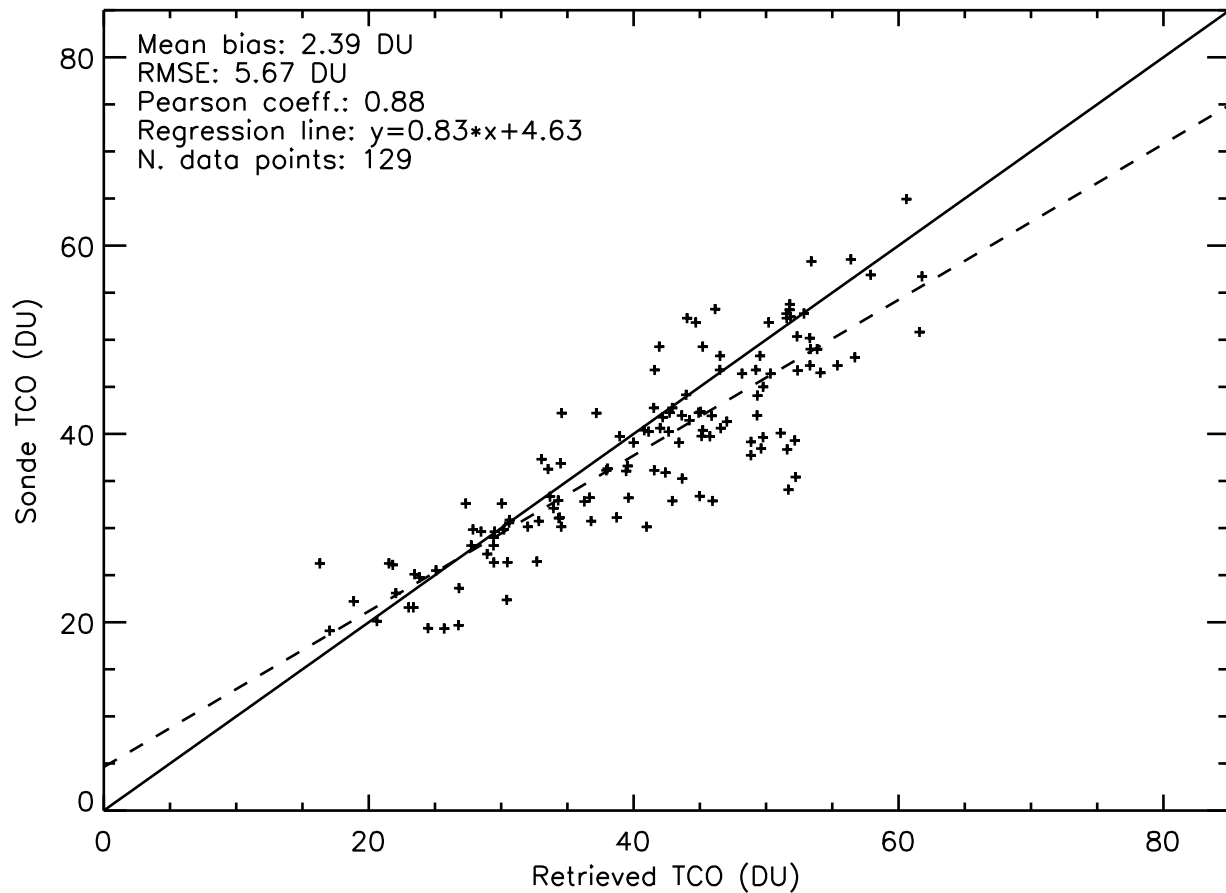

Supplement: Supplementary file 13 [file amt-6-895-2013-supplement.zip]

# WATUKOSEK (JAVA)

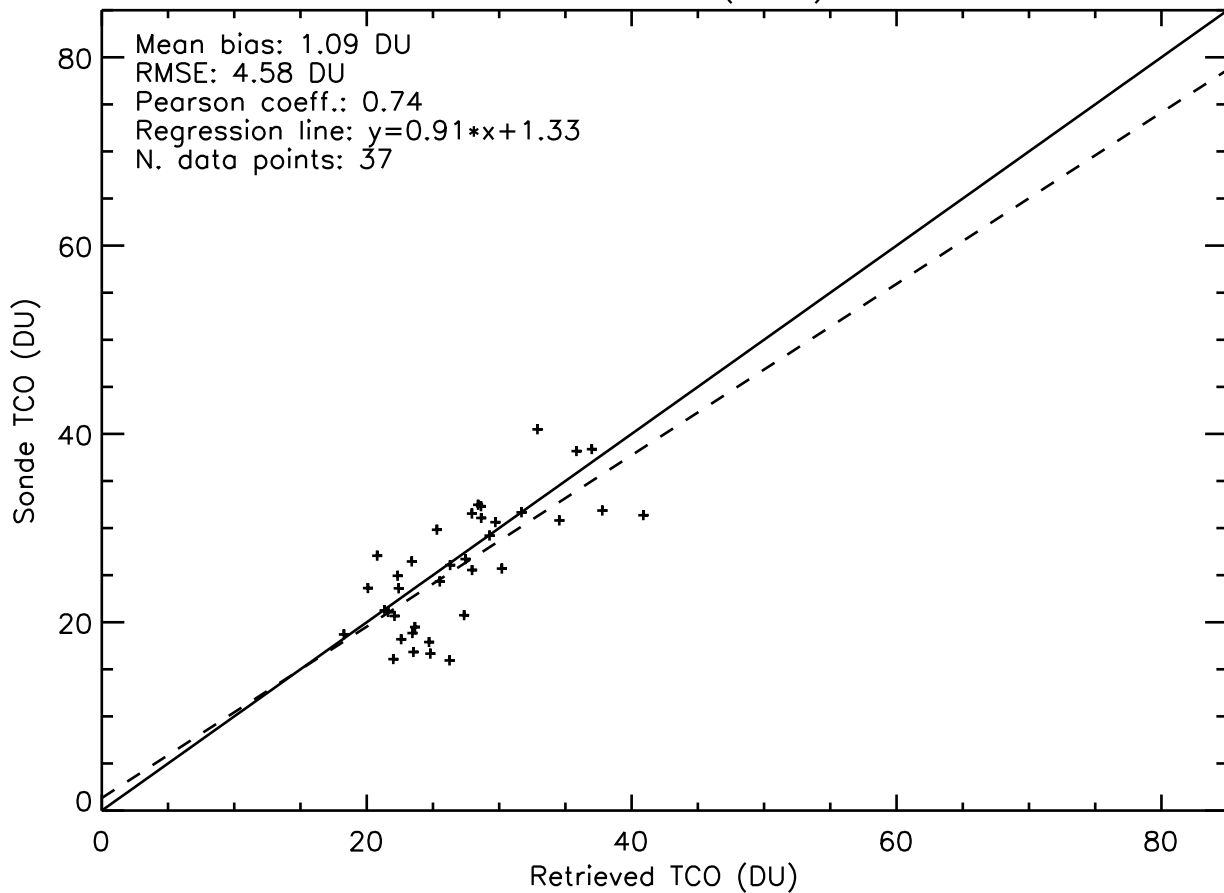

Supplement: Supplementary file 14 [file amt-6-895-2013-supplement.zip]

# SUVA (FIJI)

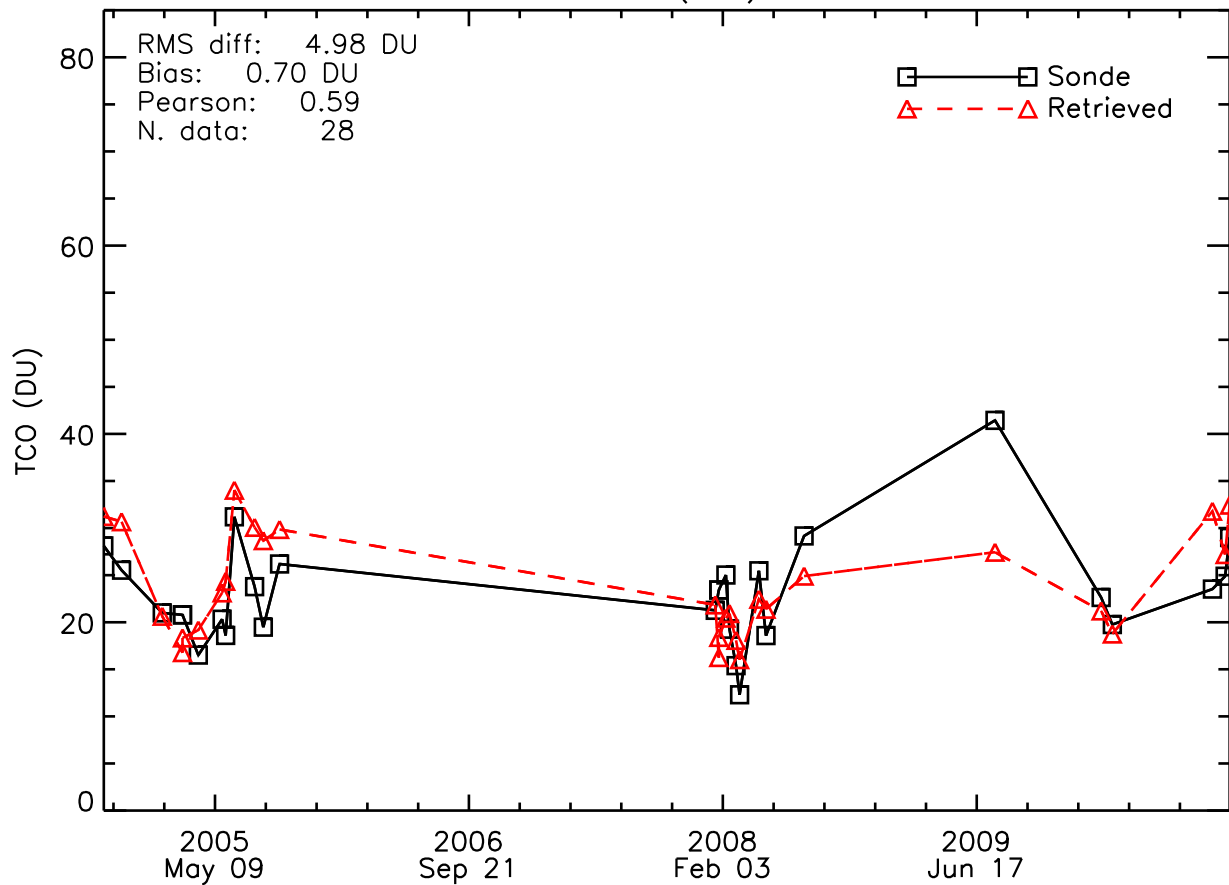

Supplement: Supplementary file 15 [file amt-6-895-2013-supplement.zip]

## DAVIS (ANTARCTICA)

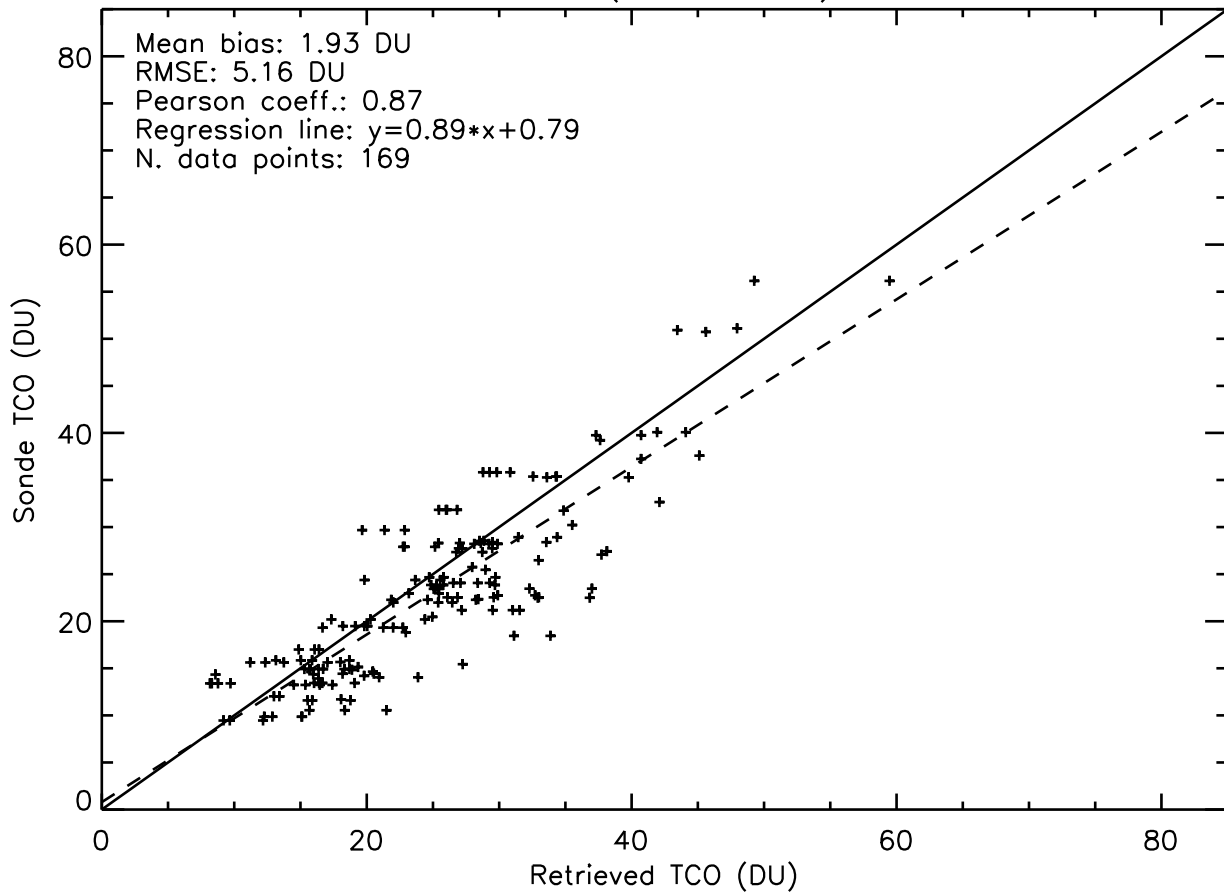

Supplement: Supplementary file 16 [file amt-6-895-2013-supplement.zip]

# HAUTE PROVENCE

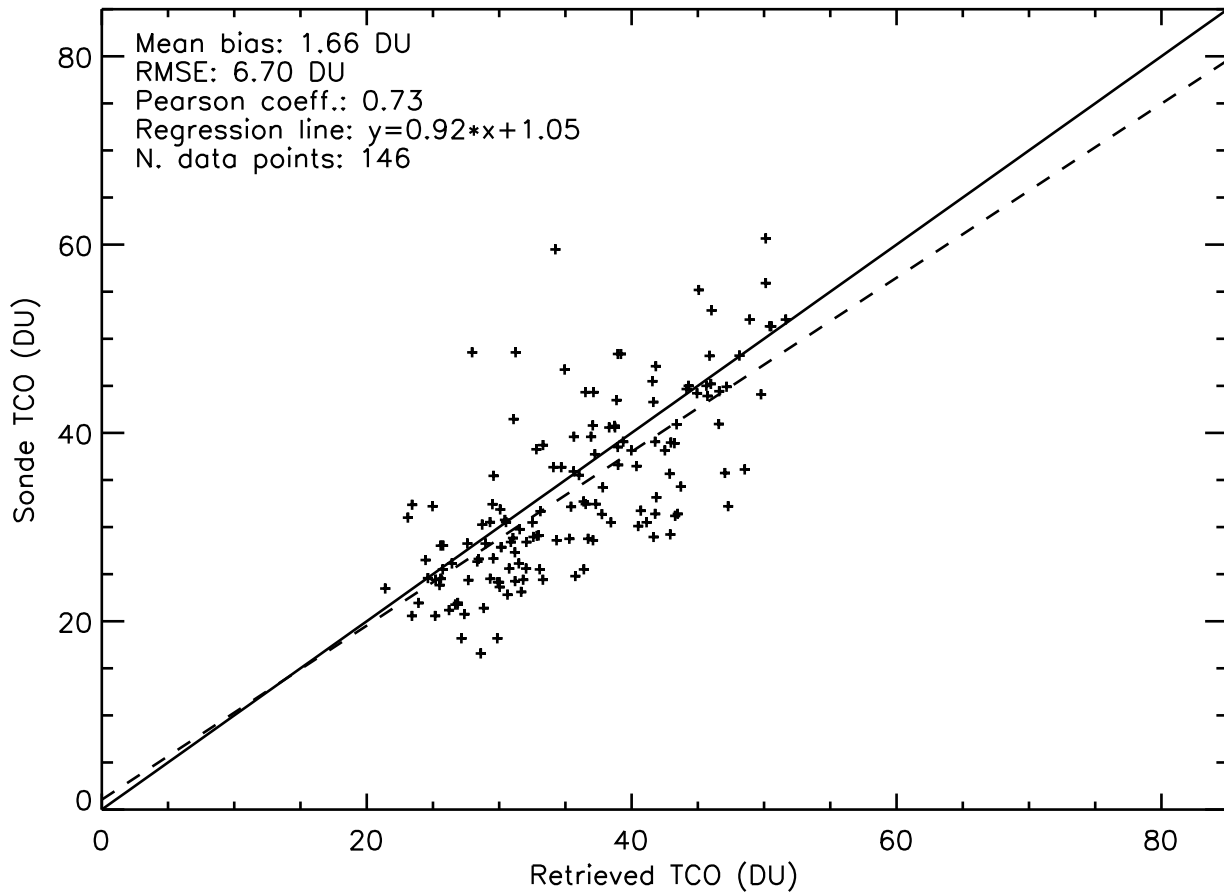

Supplement: Supplementary file 17 [file amt-6-895-2013-supplement.zip]

## SCORESBYSUND

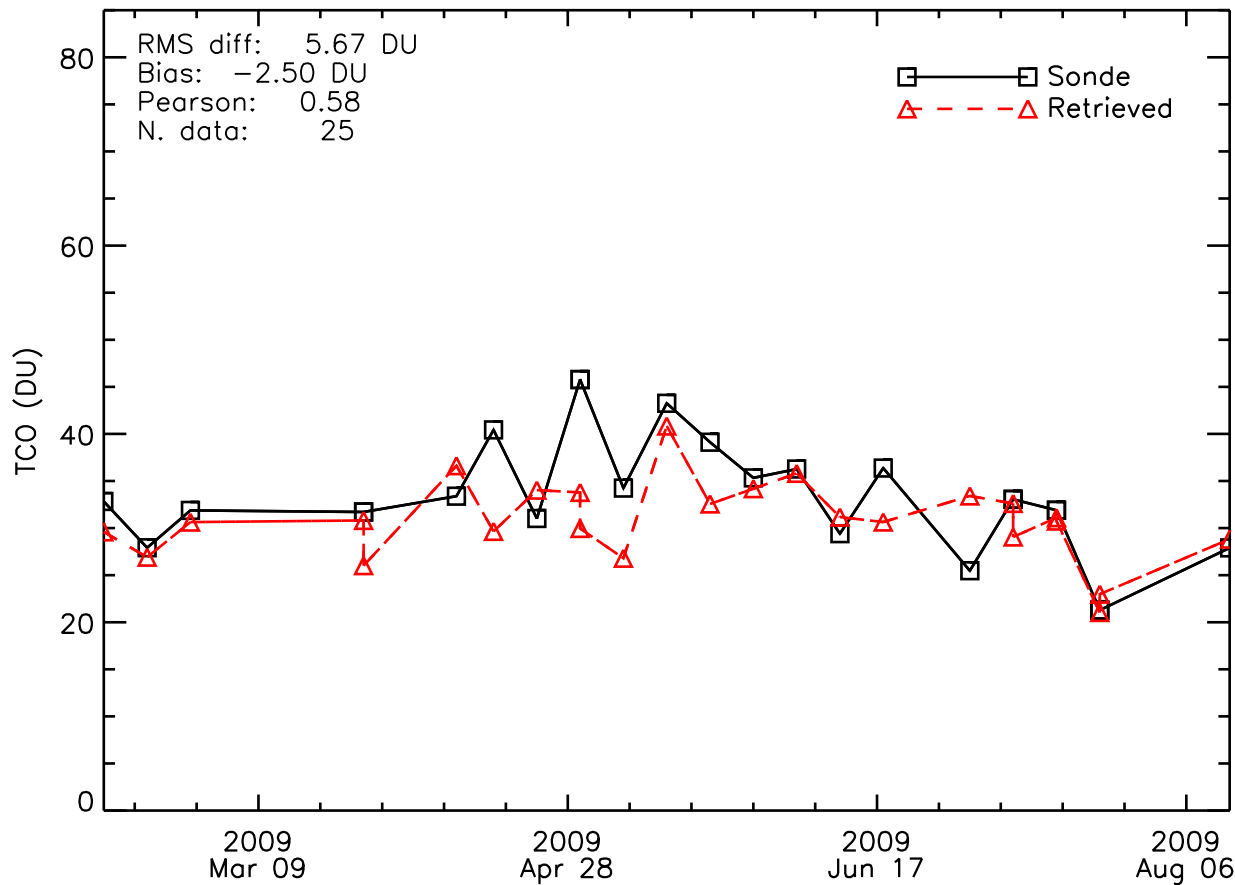

Supplement: Supplementary file 18 [file amt-6-895-2013-supplement.zip]

## LA REUNION

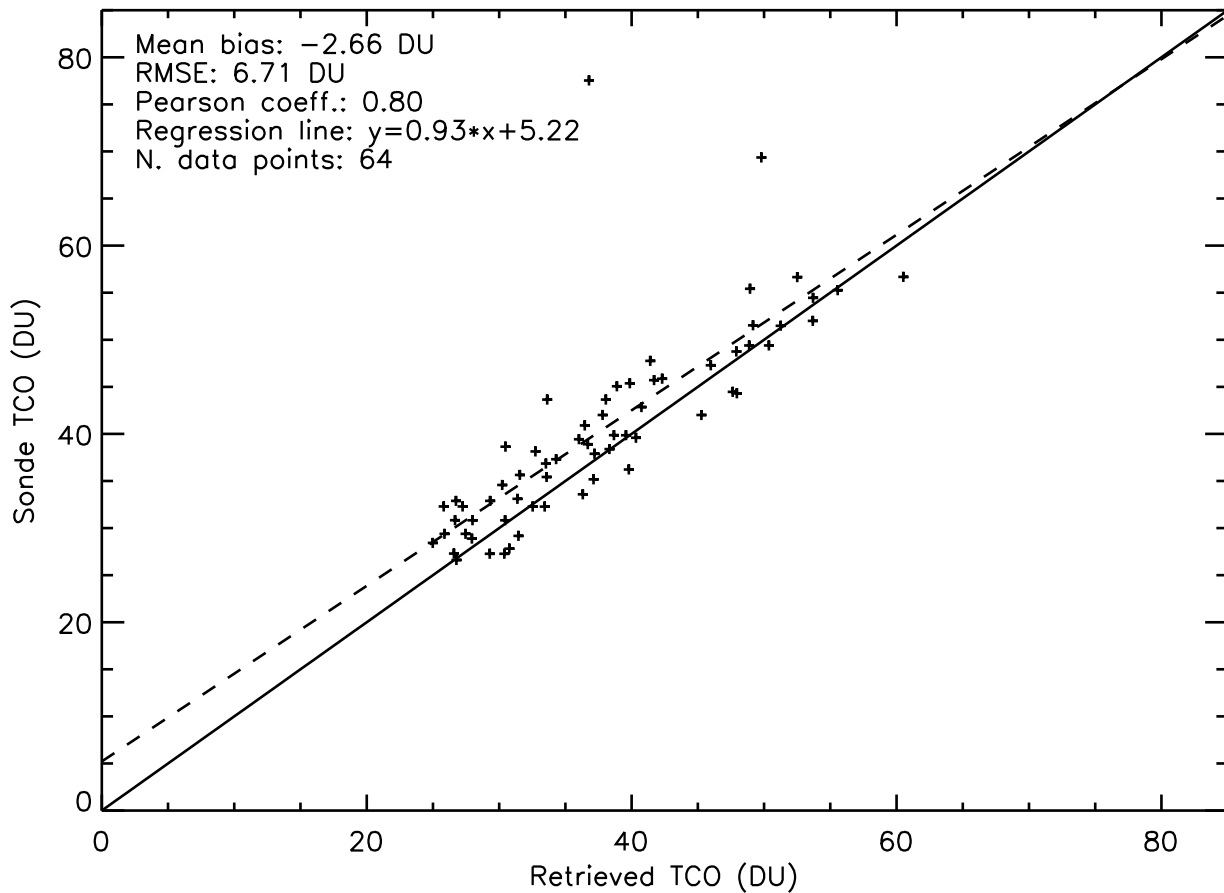

Supplement: Supplementary file 19 [file amt-6-895-2013-supplement.zip]

## SODANKYLA

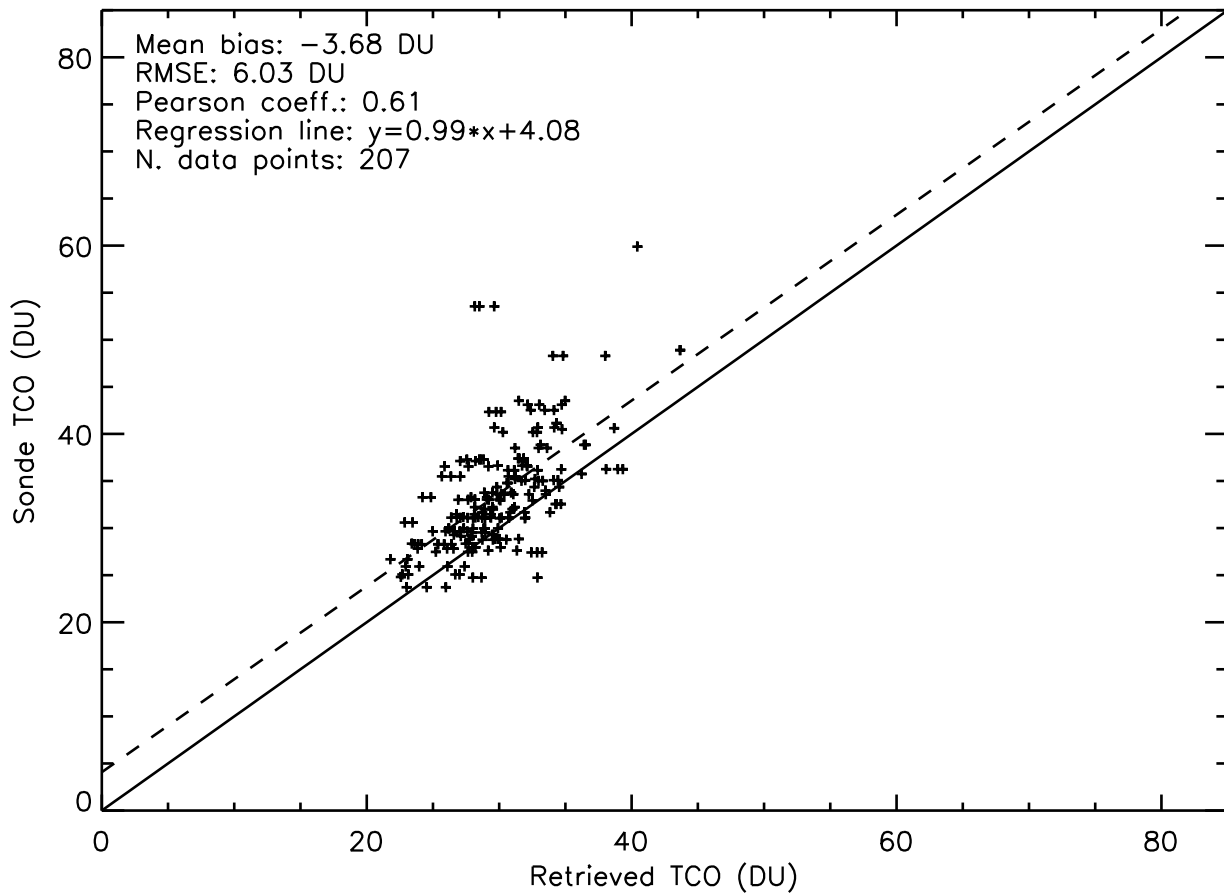

Supplement: Supplementary file 20 [file amt-6-895-2013-supplement.zip]

## NAHA

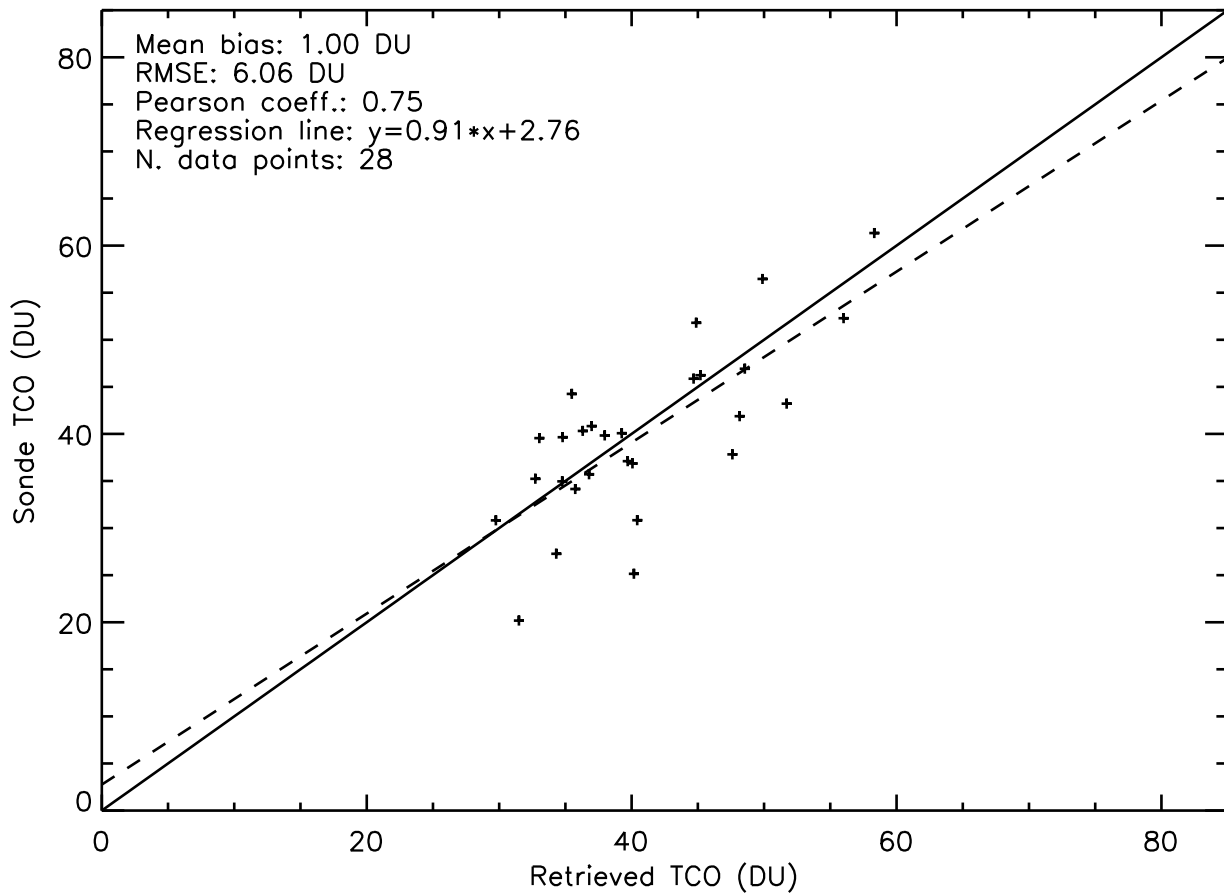

Supplement: Supplementary file 21 [file amt-6-895-2013-supplement.zip]

## HAUTE PROVENCE

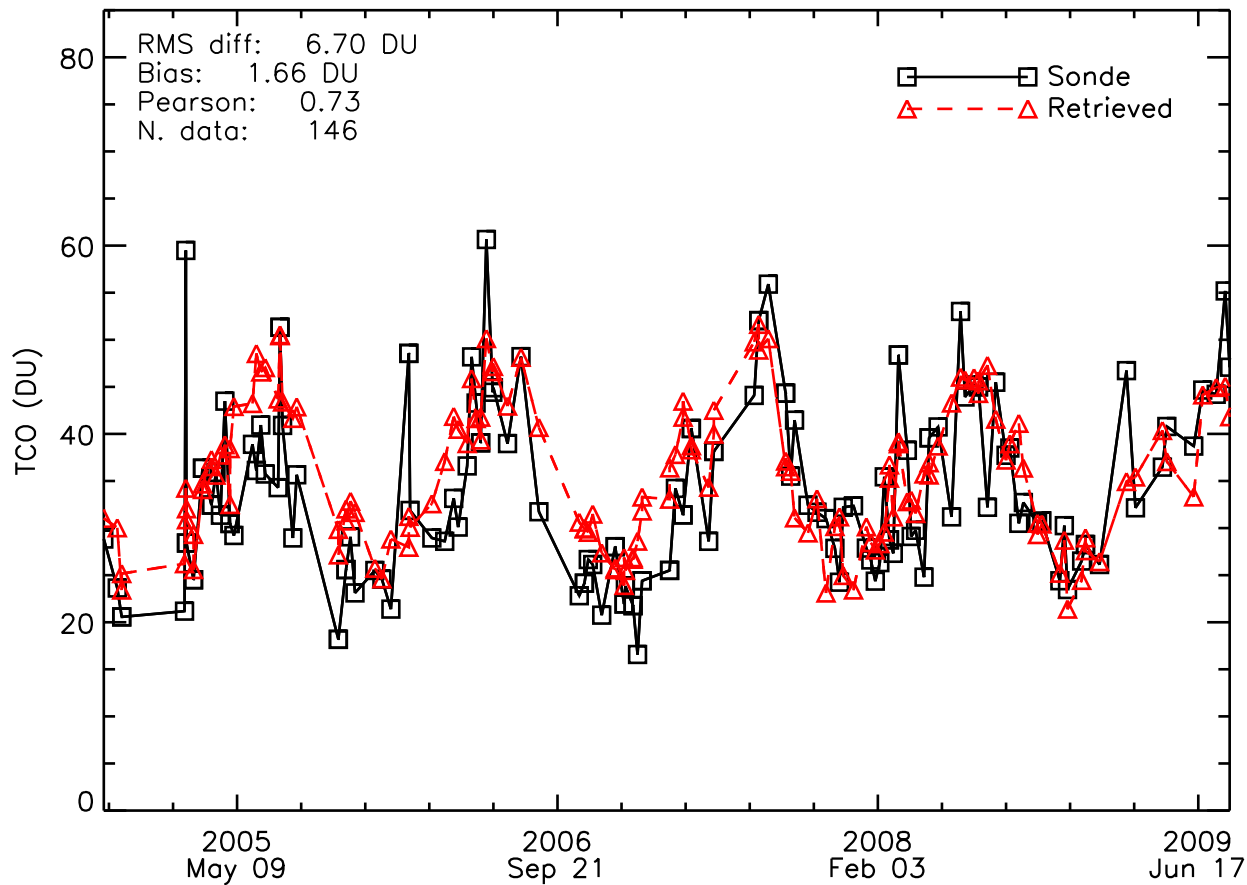

Supplement: Supplementary file 22 [file amt-6-895-2013-supplement.zip]

## DAVIS (ANTARCTICA)

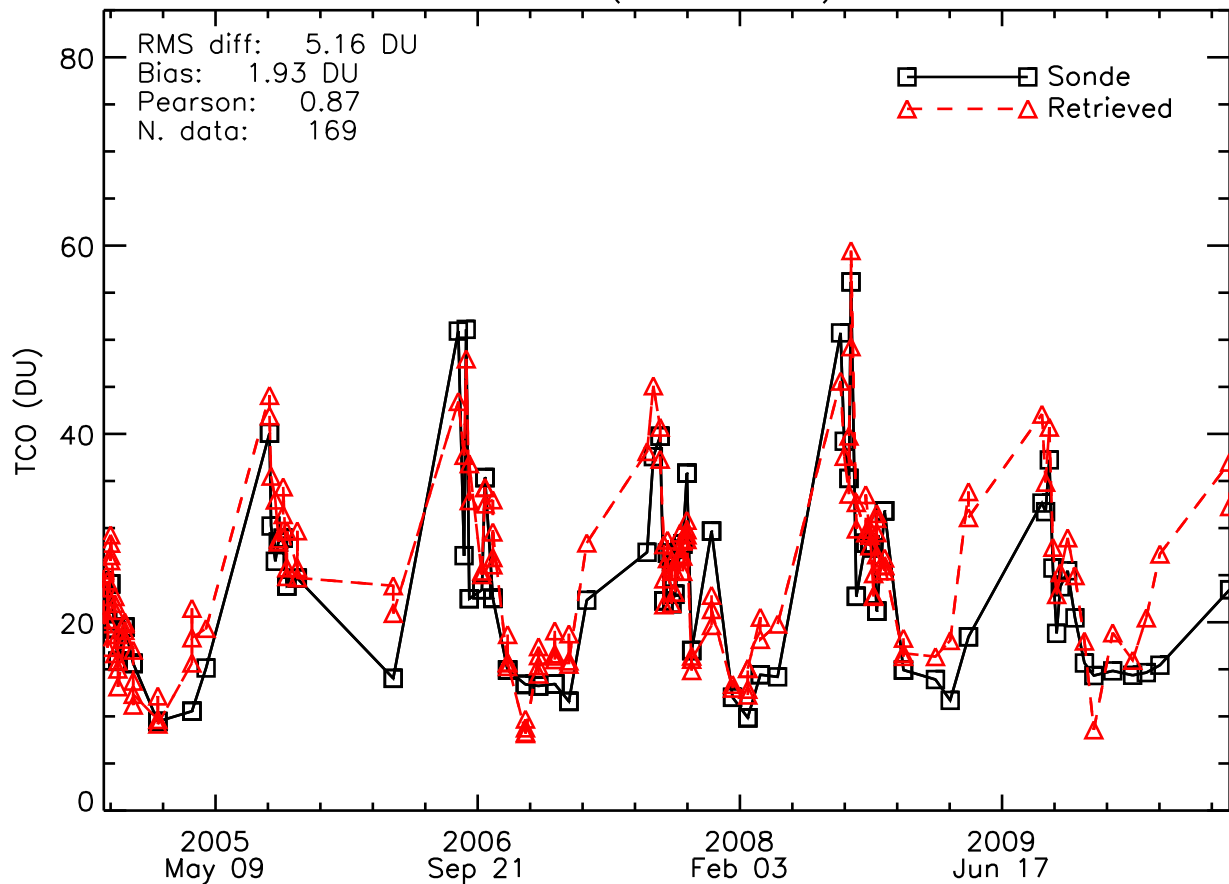

Supplement: Supplementary file 23 [file amt-6-895-2013-supplement.zip]

## EGBERT

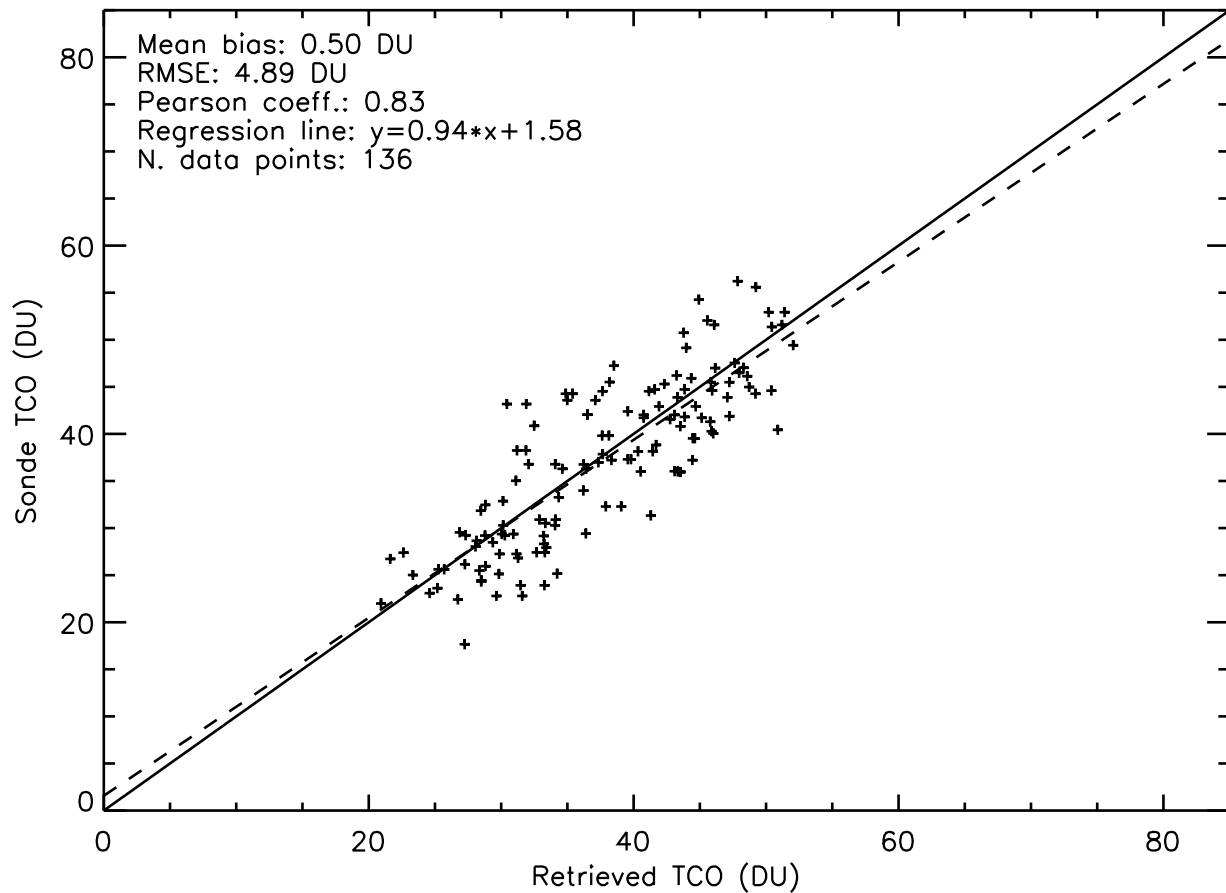

Supplement: Supplementary file 24 [file amt-6-895-2013-supplement.zip]

## SAPPORO

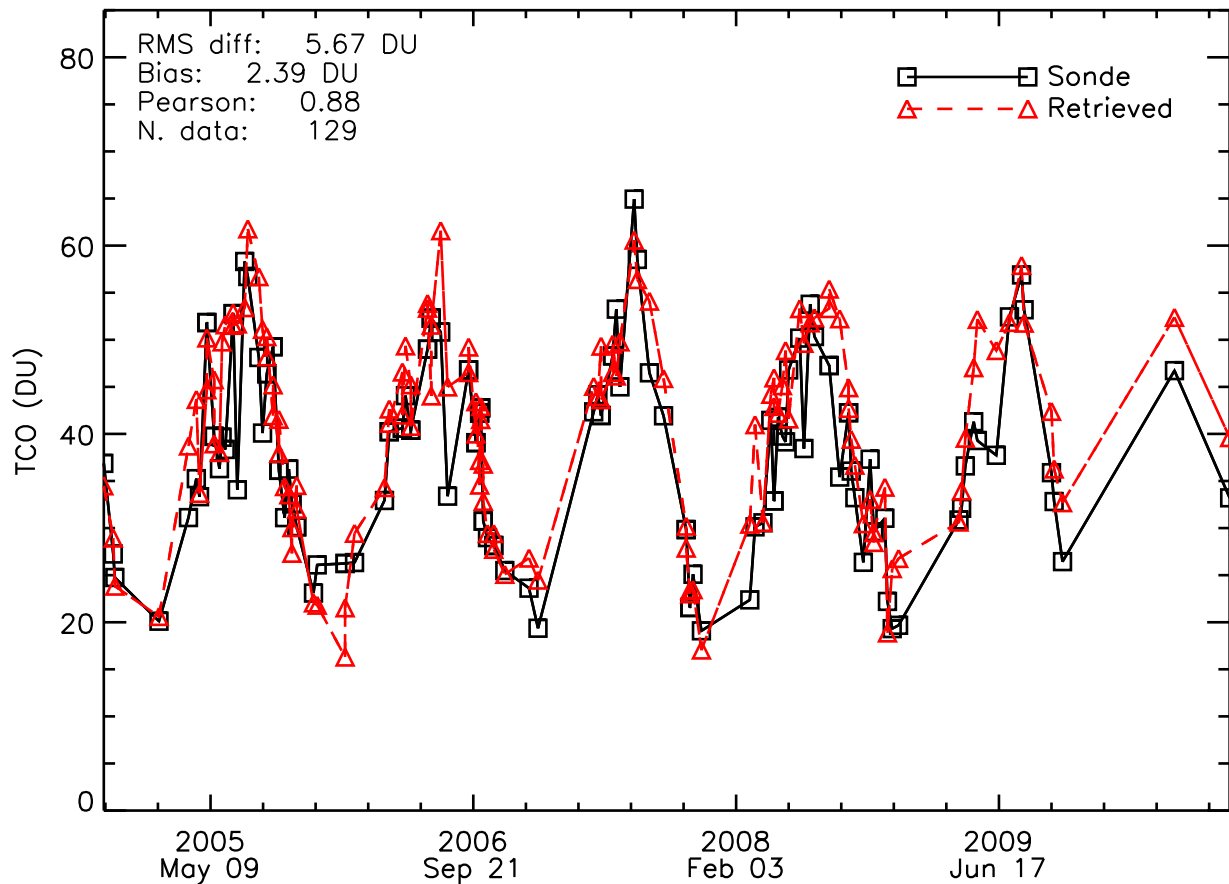

Supplement: Supplementary file 25 [file amt-6-895-2013-supplement.zip]

# MAXARANGUAPE (SHADOZ-NATAL)

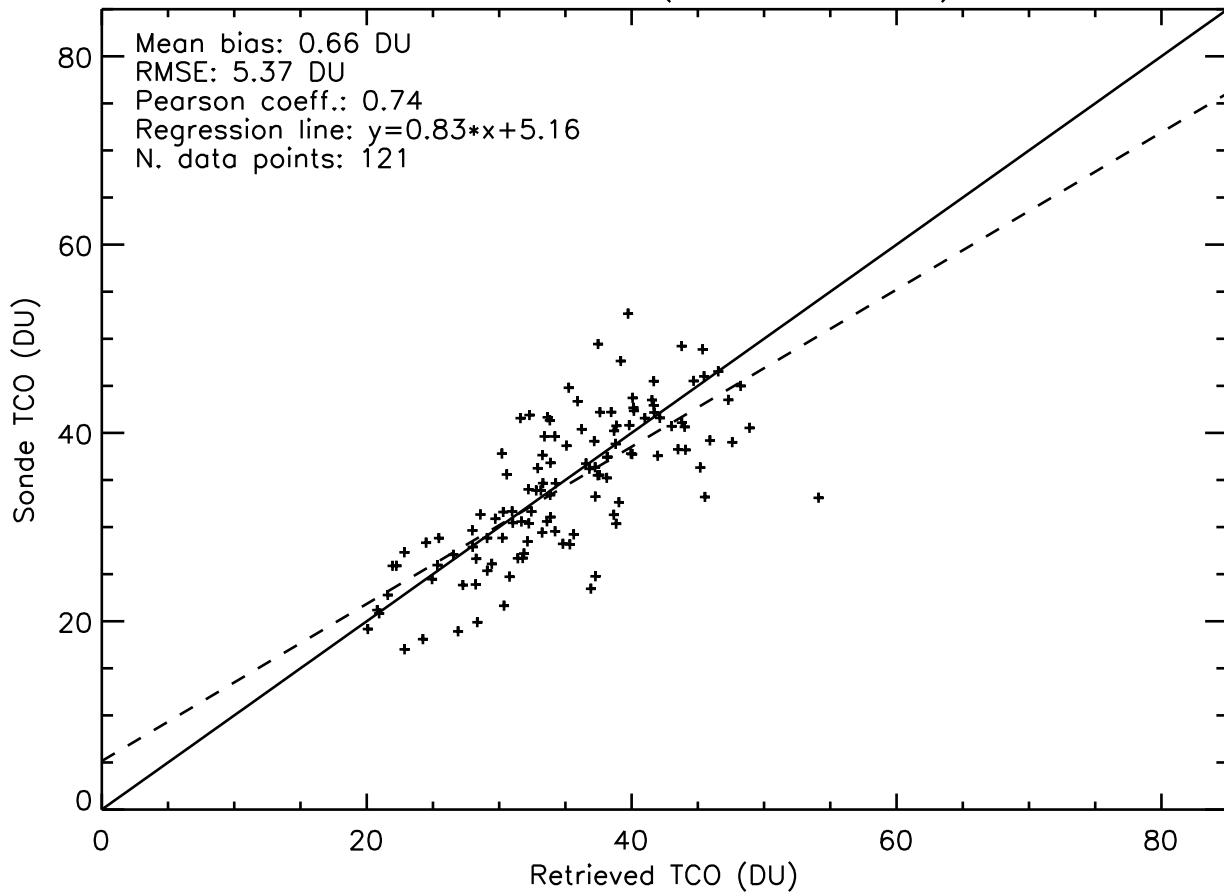

Supplement: Supplementary file 26 [file amt-6-895-2013-supplement.zip]

## SALEKHARD

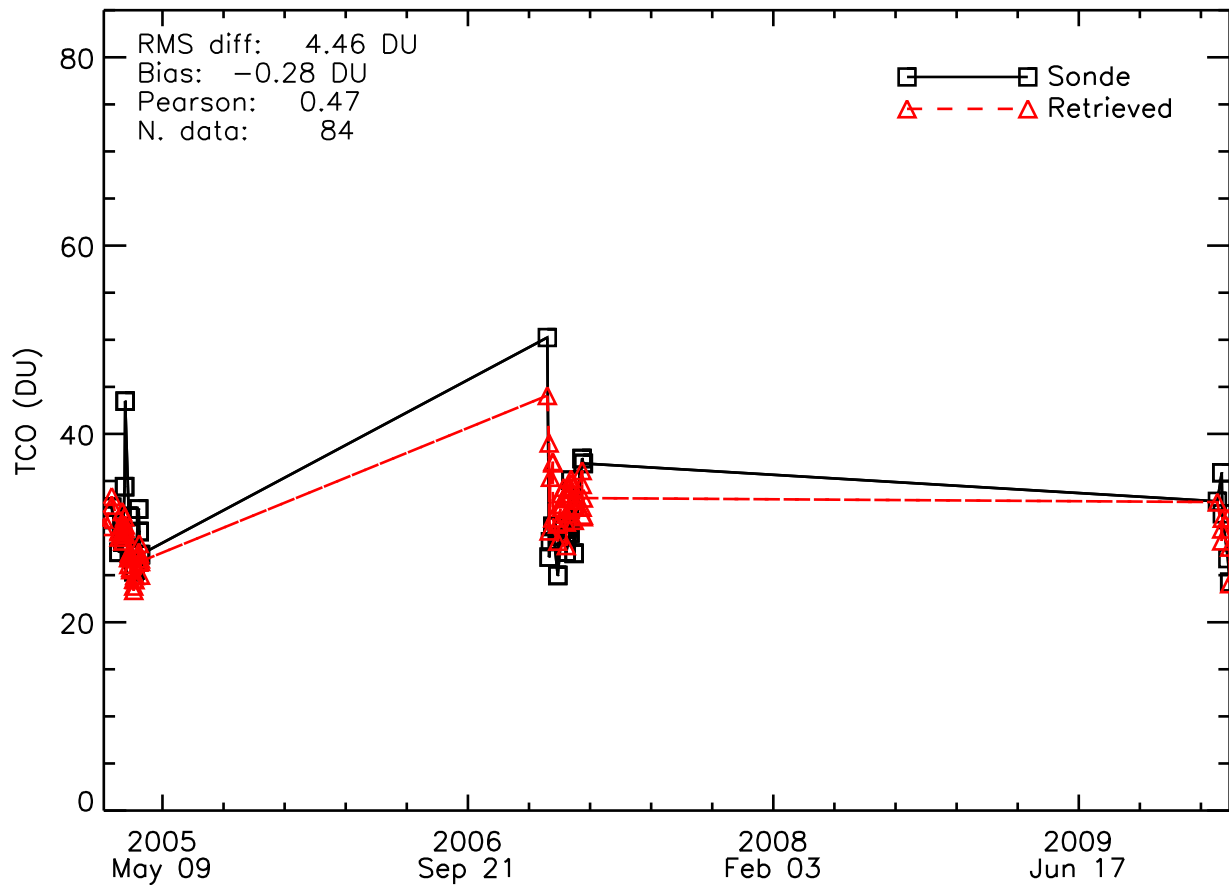

Supplement: Supplementary file 27 [file amt-6-895-2013-supplement.zip]

# ASCENSION ISLAND

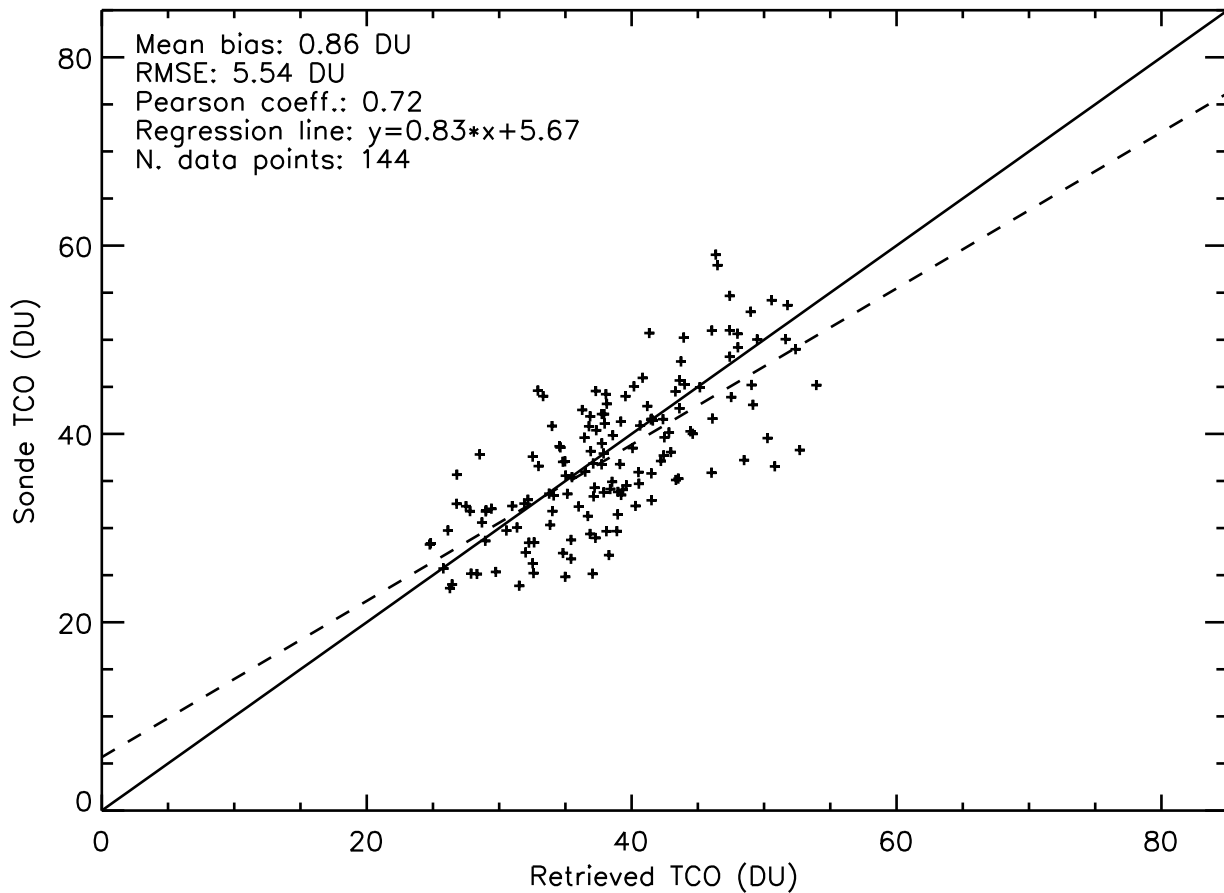

Supplement: Supplementary file 28 [file amt-6-895-2013-supplement.zip]
